# Supplementary material
Source: publisher figshare collection journal article supplement (https://acs.figshare.com/ndownloader/files/10527358)
Supplement: Supplementary file 1 [file 10527358]

## **Supporting Information**

Construction of bioactive and reinforced bioresorbable  
nanocomposites by reduced nano-graphene oxide carbon dots

*Nejla B. Erdal and Minna Hakkarainen\**

Department of Fibre and Polymer Technology, KTH Royal Institute of Technology, 100 44  
Stockholm, Sweden

This Supporting Information contains 1 table in 1 page.

## Experimental section

Tensile tests were conducted using an INSTRON 5944 module equipped with pneumatic grips. A load cell with a maximum load of 500 N at a crosshead speed of 20 mm/min was used for the measurements. Films were cut into strips with a thickness of  $0.24 \pm 0.02$  mm and width of 5 mm. A gauge length of 10 mm was used. The samples were preconditioned prior to being tested in accordance with the standard method described in ASTM D618–96 (40h at  $50\% \pm 5\%$  relative humidity and  $23^{\circ}\text{C} \pm 1^{\circ}\text{C}$ ). Six specimens from each material were tested.

## Results and discussion

Tensile test results of solutions casted PCL-2wt% nGO and PCL-2wt% r-nGO-CA nanocomposites demonstrates a significant difference in the mechanical properties induced by the two carbon nanodots. PCL-2wt% nGO display a brittle material in contrast to PCL-2wt% r-nGO-CA.

**Table 1.** Tensile test results from PCL-2wt% nGO and PCL-2wt% r-nGO-CA based on an average of 6 measurements for each sample.

|                   | Young's Modulus (MPa) | Extension at Break (%) | Tensile stress at Break (MPa) |
|-------------------|-----------------------|------------------------|-------------------------------|
| PCL-2wt% nGO      | $201 \pm 18$          | $11 \pm 0.7$           | $11 \pm 0.8$                  |
| PCL-2wt% r-nGO-CA | $196 \pm 21$          | $1790 \pm 293$         | $24 \pm 5$                    |
